# Supplementary material for: Asymmetric edge supercurrents in MoTe2 Josephson junctions
Source: Royal Society of Chemistry journal article supplement (doi:10.1039/d3na00884c), 2023-12-21
Supplement: d3na00884c1.pdf [file d3na00884c1.pdf]

## Asymmetric edge supercurrents in MoTe<sub>2</sub> Josephson junctions:

### Supporting Information

Pingbo Chen<sup>1,2,†</sup>, Jinhua Wang<sup>2,†</sup>, Gongqi Wang<sup>2</sup>, Bicong Ye<sup>2,3</sup>, Liang Zhou<sup>2</sup>, Le Wang<sup>4</sup>, Jiannong Wang<sup>3</sup>, Wenqing Zhang<sup>5,6</sup>, Weiqiang Chen<sup>2,6</sup>, Jiawei Mei<sup>2,6</sup> and Hongtao He<sup>2,6\*</sup>

<sup>1</sup>*Department of physics, Harbin Institute of Technology, Harbin, 150001, China*

<sup>2</sup>*Department of Physics, Southern University of Science and Technology, Shenzhen 518055, China*

<sup>3</sup>*Department of Physics, The Hong Kong University of Science and Technology, Clear Water Bay, Hong Kong, 999077, China*

<sup>4</sup>*Shenzhen Institute for Quantum Science and Engineering, Southern University of Science and Technology, Shenzhen, 518055, China*

<sup>5</sup>*Department of Materials Science and Engineering, Southern University of Science and Technology, Shenzhen 518055, China*

<sup>6</sup>*Shenzhen Key Laboratory for Advanced Quantum Functional Materials and Devices, Southern University of Science and Technology, Shenzhen 518055, China*

\*Corresponding author email address: [heht@sustech.edu.cn](mailto:heht@sustech.edu.cn)

<sup>†</sup>These authors contributed equally to this work

## Extraction of the supercurrent distribution with the Dynes-Fulton method

For a Josephson junction exposed to a perpendicular magnetic field  $B$ , the magnitude of the critical current  $I_c(B)$  is strongly correlated with the supercurrent distribution  $J_c(x)$ . To understand this relationship, we first consider the complex Fourier transform of  $J_c(x)$ , which yields a complex critical current function,

$$I_c(B) = |I_c(B)| = \left| \int_{-\infty}^{+\infty} J_c(x) \exp\left(-\frac{i2\pi L_{eff} B x}{\Phi_0}\right) dx \right| \quad (1)$$

where  $x$  represents the dimension along the width of the junction, and  $L_{eff} = L + 2\lambda$  stands for the effective length of the junction. Additionally,  $\Phi_0$  is the magnetic flux quantum with a value of  $\frac{h}{2e}$ . In the following, we will derive  $J_c(x)$  from the observed  $I_c(B)$  pattern using the method proposed by Dynes and Fulton [1].

When the current distribution is symmetric, *i.e.*, the odd part of  $\exp\left(\frac{i2\pi L_{eff} B x}{\Phi_0}\right)$  vanishes in the

integral, Eq. (1) becomes  $I_E(B) = \int_{-\infty}^{+\infty} J_E(x) \cos\left(\frac{2\pi L_{eff} B x}{\Phi_0}\right) dx$ . However, if the current distribution has a small odd component, we also need to consider the Fourier transform of this odd component,

$$I_O(B) = \int_{-\infty}^{+\infty} J_O(x) \sin\left(\frac{2\pi L_{eff} B x}{\Phi_0}\right) dx. \quad \text{Thus, the overall complex critical current is}$$

$$I_c(B) = I_E(B) + iI_O(B) \quad (2)$$

The observed critical current  $I_c(B)$  is given by  $I_c(B) = \sqrt{I_E^2(B) + I_O^2(B)}$ . Through appropriate mathematical manipulation, we can recover  $J_c(x)$  from the observed  $I_c(B)$ . The even component,  $I_E(B)$ , is obtained by flipping the sign of alternate lobes in the  $I_c(B)$  pattern, as shown in Supplementary Fig. 1 (b). The odd component,  $I_O(B)$ , is derived by interpolating between the minima of  $I_c(B)$  and flipping sign between lobes, as shown in Supplementary Fig. 1 (c). Finally, by performing an inverse Fourier transform of  $I_c(B)$ , we can obtain the supercurrent density profile,

$$J_c(x) = \frac{1}{\Delta BW} \left| \int_{B_{min}}^{B_{max}} I_c(B) \exp\left(\frac{-i2\pi L_{eff} B x}{\Phi_0}\right) dB \right|. \quad (3)$$

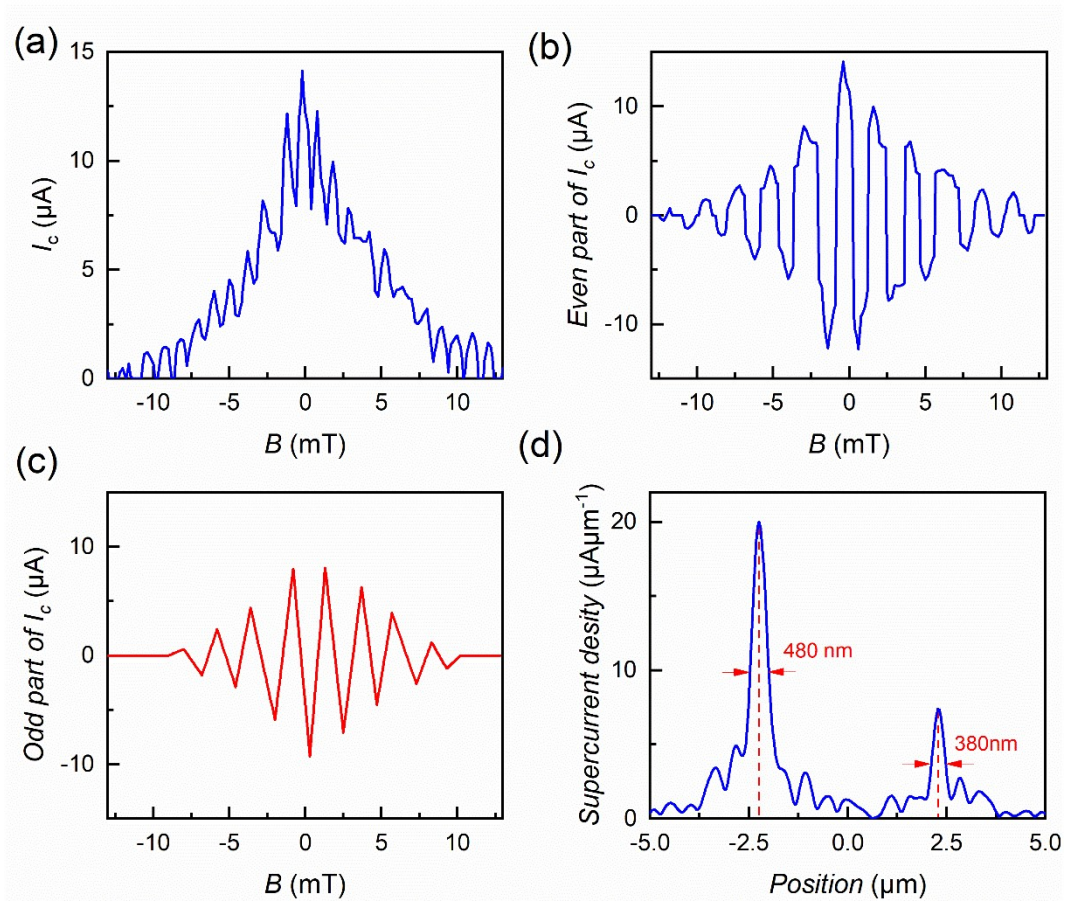

**Figure S1.** (a) Field dependence of the critical current  $I_c(B)$ . (b) The critical current  $I_E(B)$  corresponding to the even component of the current distribution  $J_E(x)$ . (c) The critical current  $I_O(B)$  corresponding to the odd component of the current distribution  $J_O(x)$ . (d) The derived current density distribution  $J_c(x)$ .

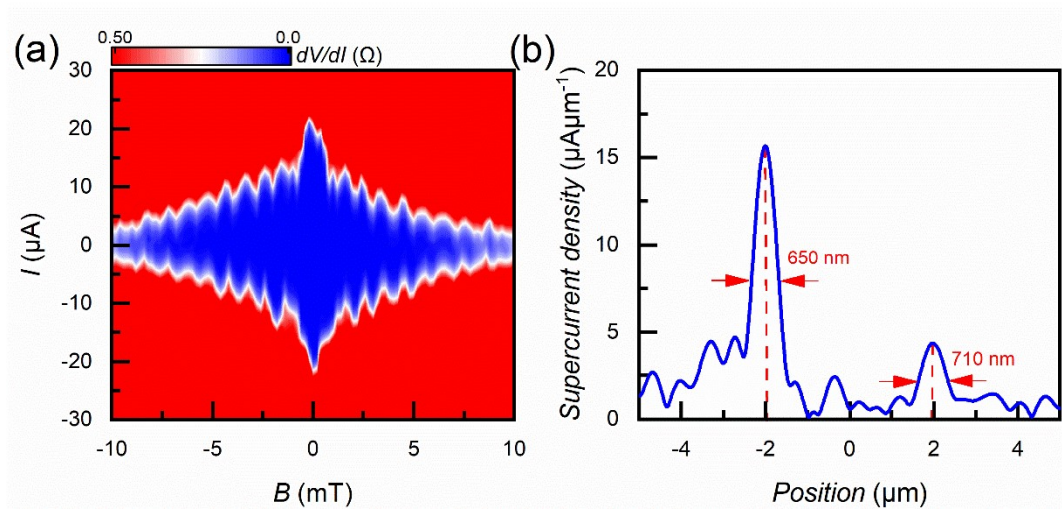

**Fig**

**Figure S2.** Asymmetric edge supercurrents were also observed in another Nb/MoTe<sub>2</sub>/Nb Josephson junction with  $L=400$  nm,  $W=3.94$  μm, and  $t=50$  nm. (a) Color map of the differential resistance

versus the current bias and magnetic field at  $T=0.9$  K. (b) The supercurrent density distribution derived with the Dynes-Fulton method, clearly showing the presence of edge states with characteristic widths of 650 nm and 710 nm, respectively.

### **Supporting reference**

[1] R. C. Dynes and T. A. Fulton, *Phys. Rev. B*, 1971, **3**, 3015-3023.
